# Supplementary material for: Preclinical Evaluation of AMG 925, a FLT3/CDK4 Dual Kinase Inhibitor for Treating Acute Myeloid Leukemia
Source: Oxford University Press journal article supplement (doi:10.1158/1535-7163.mct-13-0858), 2014-02-13
Supplement: 15357163mct130858-sup-mct-13-0858figs1-2tab1.pdf [file 15357163mct130858-sup-mct-13-0858figs1-2tab1.pdf]

## Supplementary Data

### “AMG 925, a FLT3/CDK4 dual inhibitor for treating AML”

**Table S1. Selectivity profile of AMG 925 ( $K_d$  for kinases with POC < 20 at 1  $\mu$ M in KenomScan)**

| Kinase        | $K_d$ (nM) | Kinase      | $K_d$ (nM) | Kinase     | $K_d$ (nM) | Kinase      | $K_d$ (nM) |
|---------------|------------|-------------|------------|------------|------------|-------------|------------|
| TTK/Mps-1     | 0.17       | CSNK2A1     | 7.5        | CSF1R      | 52         | JNK1        | 150        |
| CDK4-cyclinD1 | 0.19       | FLT3(R834Q) | 13         | STK16      | 52         | KIT         | 150        |
| CDK4-cyclinD3 | 0.74       | CLK4        | 15         | TYK2       | 58         | DYRK2       | 160        |
| GAK           | 0.96       | PLK4        | 21         | MEK4       | 71         | ICK         | 160        |
| FLT3(D835Y)   | 1.1        | CLK1        | 23         | KIT(D816V) | 72         | IRAK3       | 160        |
| FLT3(D835H)   | 1.2        | MEK3        | 25         | MKNK2      | 73         | RSK3        | 160        |
| CSNK2A2       | 2          | ERK8        | 32         | PIP5K2C    | 73         | PDGFRB      | 180        |
| FLT3          | 2.3        | PFTK1       | 32         | KIT(V559D) | 80         | RSK1        | 190        |
| FLT3(K663Q)   | 3.8        | JNK3        | 34         | KIT(L576P) | 81         | AMPK-alpha2 | 200        |
| FLT3(ITD)     | 3.9        | PCTK1       | 35         | TRKB       | 83         | RIOK2       | 220        |
| FLT3(N841I)   | 4          | JNK2        | 44         | TRKA       | 97         | CDKL5       | 270        |
| DYRK1A        | 4.1        | MEK5        | 46         | MST4       | 120        | GSK3B       | 540        |
| DYRK1B        | 5.9        | CDK2        | 48         | RSK2       | 120        | BIKE        | 660        |
| CLK2          | 6.1        | TRKC        | 49         | JAK1       | 150        |             |            |

POC: percent of control = test compound signal - positive control signal / (negative control signal - positive control signal)  $\times$  100.  $K_d$  values were determined at DiscoverX with a proprietary competitive binding assay (S1).

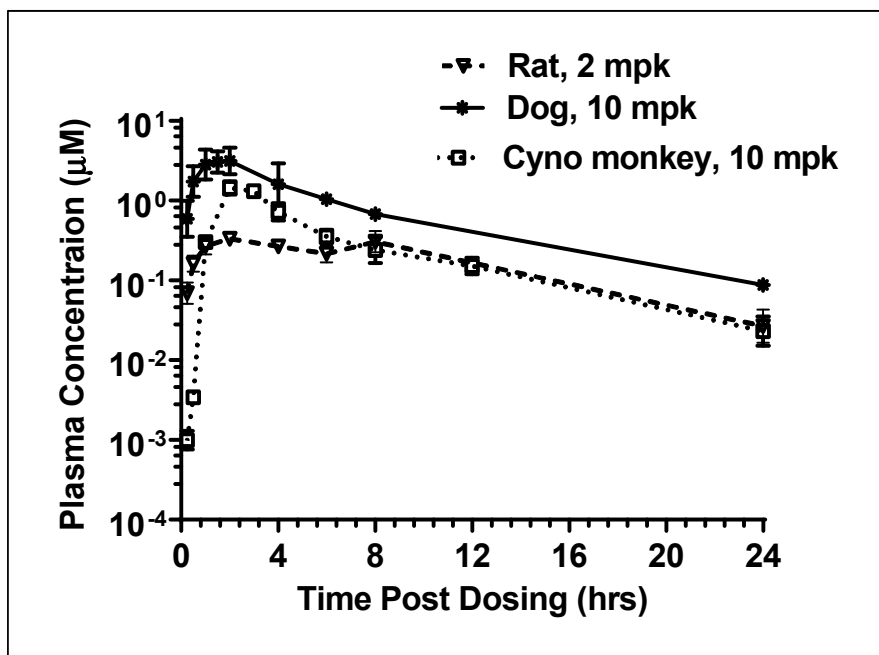

**Figure S1. Plasma concentration-time profiles of AMG 925 in rat, dog, and cynomolgus monkey following oral administration.** Vehicle was water/acetate/Tween (pH4, v/v/v = 96/3/1) for rat and 20% captisol for dog and monkey. n = 3, mpk = mg/kg, data presented as mean  $\pm$  SD.

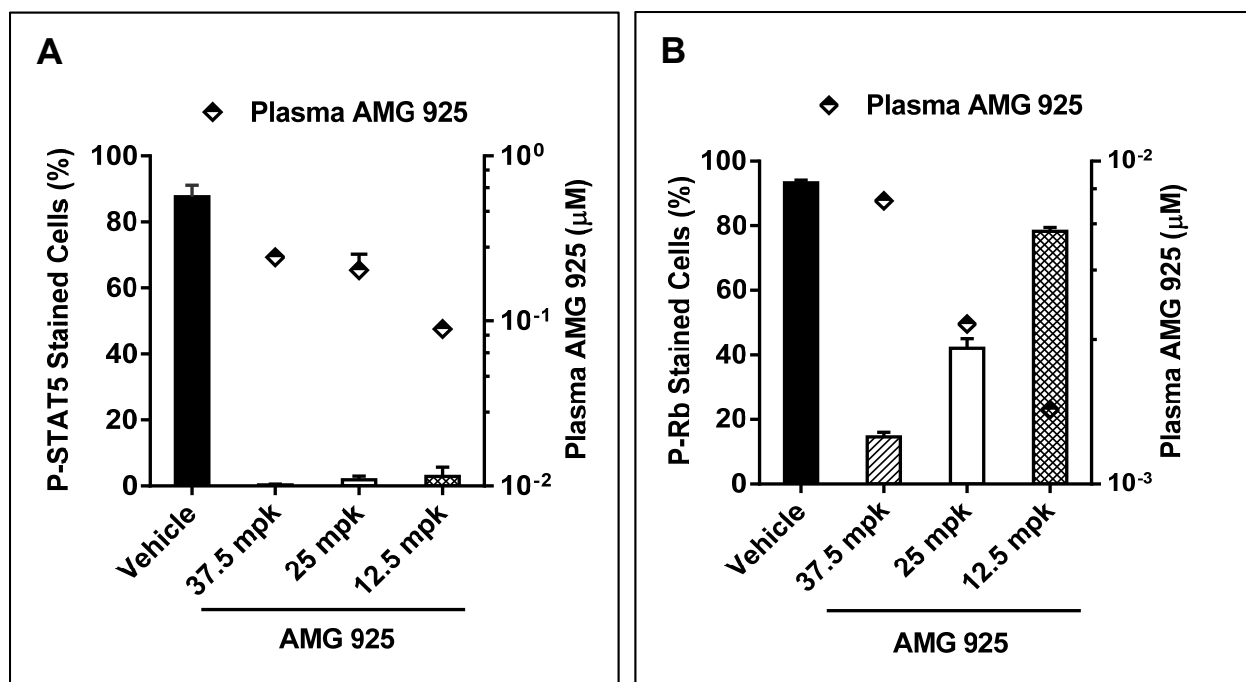

**Figure S2. Inhibition of STAT5 and Rb phosphorylation by AMG 925 in MOLM13-Luc tumor cells in bone marrow.** To assess the effect of AMG 925 on phosphorylation of STAT5 (P-STAT5) and Rb (P-Rb) in the tumor cells in bone marrow, mice were injected with MOLM13-Luc cells and allowed 14 days to engraft. Mice were then randomized into groups of 3 and treated twice with AMG 925, 6 hours apart. At 8 and 24 hrs after the first dose administration, mice were sacrificed and femurs harvested and processed for IHC detection of P-STAT5 and P-Rb, respectively. Plasma samples were collected for concentration of AMG 925 at the same time. Concentrations of unbound AMG 925 were indicated. All groups were statistically different from vehicle ( $p < 0.001$ ) as analyzed by paired T-test.  $n = 3$ , mpk = mg/kg, data presented as mean  $\pm$  SEM.

## Supplementary References

1. [www.kinomescan.com](http://www.kinomescan.com).
